# Supplementary material for: Synthesis, crystal structure, and properties of stoichiometric hard tungsten tetraboride, WB4
Source: Royal Society of Chemistry journal article supplement (doi:10.1039/d2ta02268k), 2022-01-01
Supplement: d2ta02268k1.pdf [file d2ta02268k1.pdf]

## Supplementary material for

# Synthesis, crystal structure, and properties of stoichiometric hard tungsten tetraboride, WB<sub>4</sub>

Elena Bykova,<sup>1,2</sup> Sergey V. Ovsyannikov,<sup>1</sup> Maxim Bykov,<sup>3</sup> Yuqing Yin,<sup>4,5</sup> Timofey Fedotenko<sup>6</sup>, Hendrik Holz,<sup>7</sup> Stefan Gabel,<sup>7</sup> Benoit Merle,<sup>7</sup> Stella Chariton,<sup>8</sup> Vitali B. Prakapenka,<sup>8</sup> Natalia Dubrovinskaia,<sup>4,9</sup> Alexander F. Goncharov<sup>2</sup>, and Leonid Dubrovinsky<sup>1</sup>

<sup>1</sup> Bayerisches Geoinstitut, University of Bayreuth, Universitätsstrasse 30, D-95447, Bayreuth, Germany

<sup>2</sup> Earth and Planets Laboratory, Carnegie Institution for Science, 5241 Broad Branch Road, NW, Washington DC, 20015, USA

<sup>3</sup> Institute of Inorganic Chemistry, University of Cologne, Greinstrasse 6, 50939 Cologne, Germany

<sup>4</sup> Material Physics and Technology at Extreme Conditions, Laboratory of Crystallography, University of Bayreuth, 95440 Bayreuth, Germany

<sup>5</sup> State Key Laboratory of Crystal Materials, Shandong University, Jinan 250100, China

<sup>6</sup> Photon Science, Deutsches Elektronen-Synchrotron, Notkestrasse 85, 22607 Hamburg, Germany

<sup>7</sup> Friedrich-Alexander-Universität Erlangen-Nürnberg, Department of Materials Science and Engineering, Institute I, Interdisciplinary Center for Nanostructured Films (IZNF), Cauerstr. 3, 91058 Erlangen, Germany

<sup>8</sup> Center for Advanced Radiation Sources, The University of Chicago, 5640 S. Ellis, Chicago, IL, 60637, USA

<sup>9</sup> Department of Physics, Chemistry and Biology (IFM), Linköping University, SE-58183 Linköping, Sweden

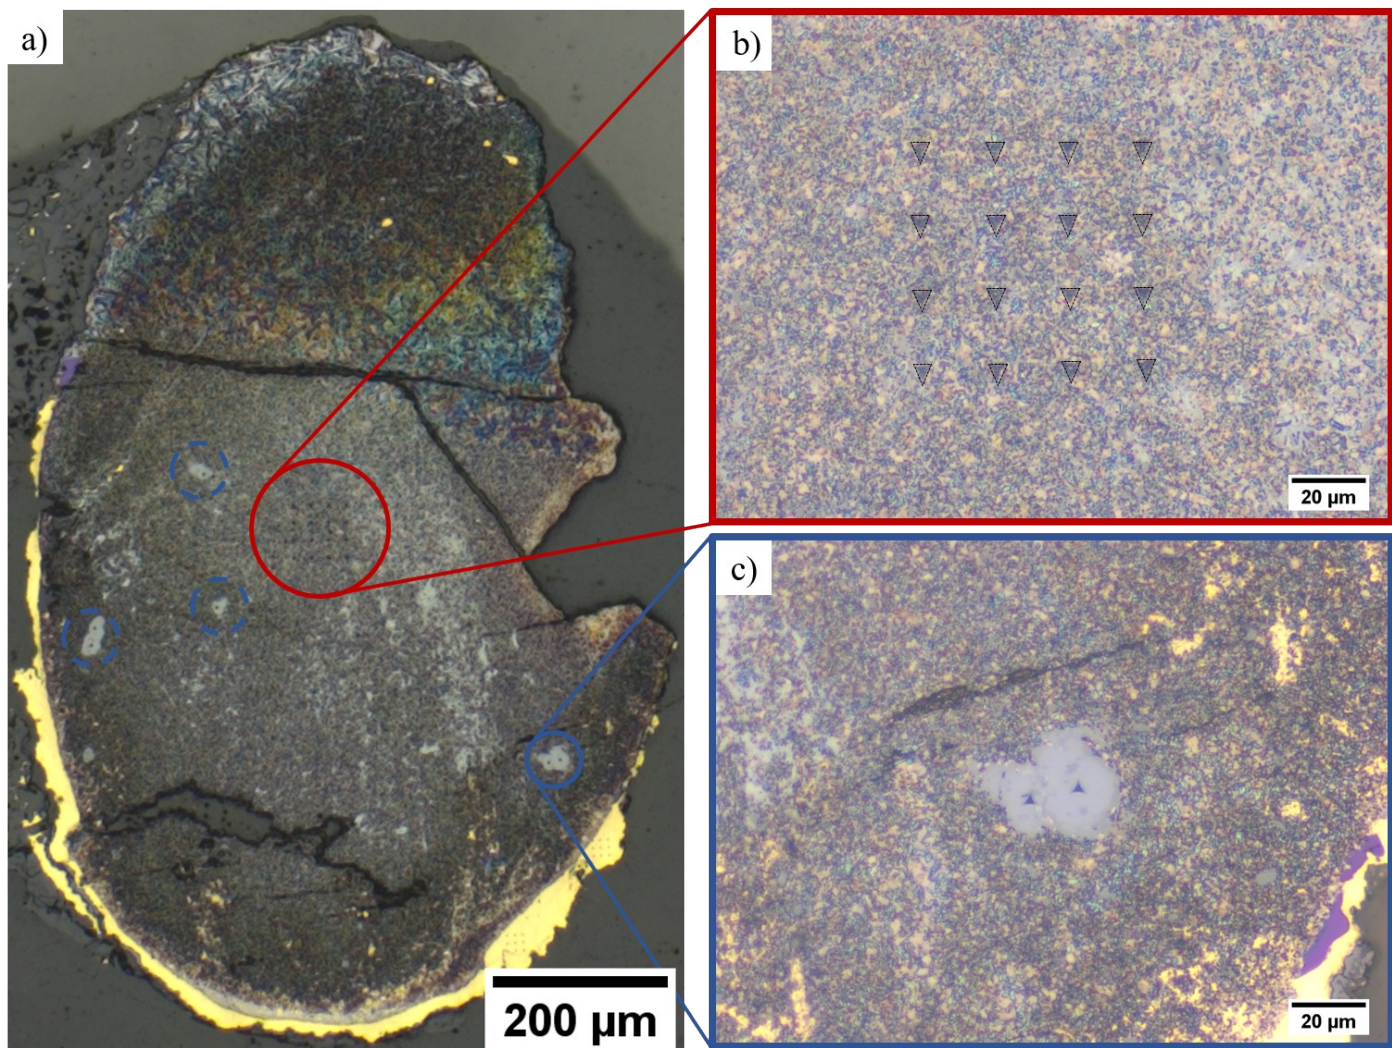

Figure S1. Optical micrographs of the sample after nanoindentation. Overview (*a*) with the areas of interest shown as insets. The red rectangle magnifies a likely polycrystalline region; black triangles that mark the position of the indents (*b*). The blue rectangle magnifies a likely single crystalline region (*c*).

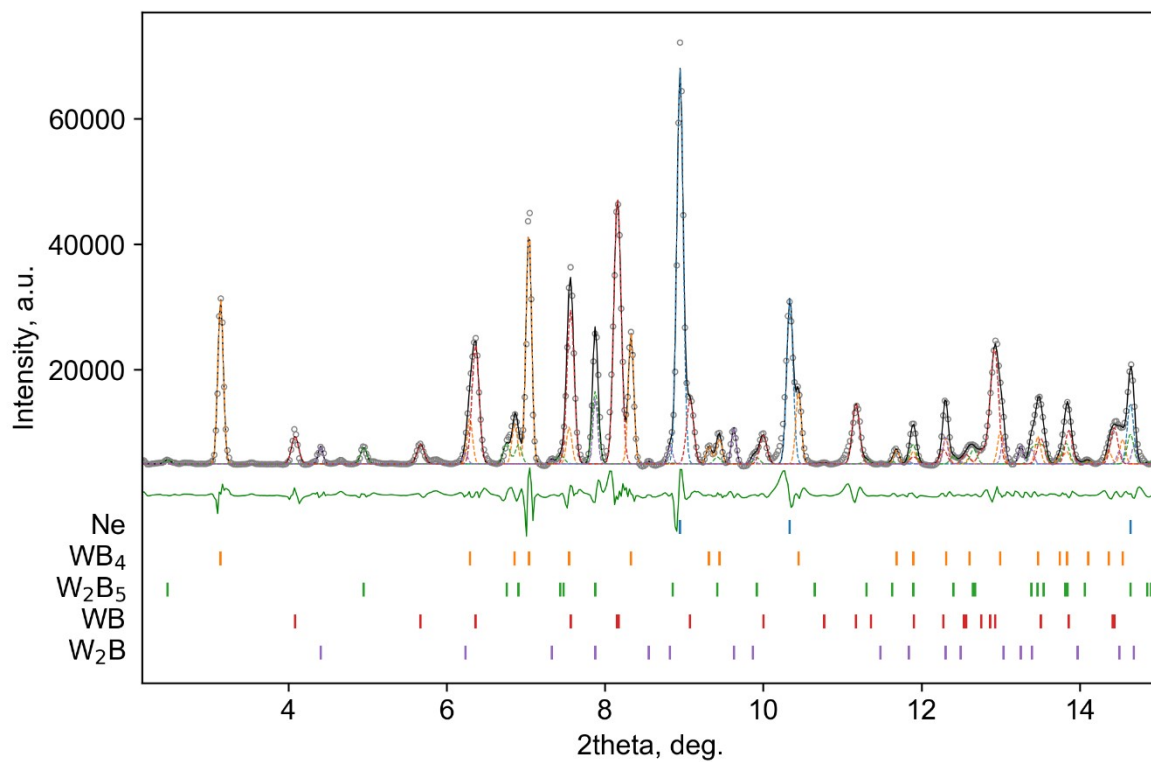

Figure S2. Powder X-ray diffraction pattern collected at 30.3(5) GPa after the laser heating up to 2300(100) K ( $\lambda = 0.2952 \text{ \AA}$ ): the experimental data are shown by grey circles (the background was subtracted), a Le Bail fit – by dash lines (WB<sub>4</sub> – orange, W<sub>2</sub>B<sub>5</sub> – green, WB – red, W<sub>2</sub>B – violet, Ne pressure medium - blue), a difference curve – by the green solid line; the ticks show predicted positions of the diffraction peaks.

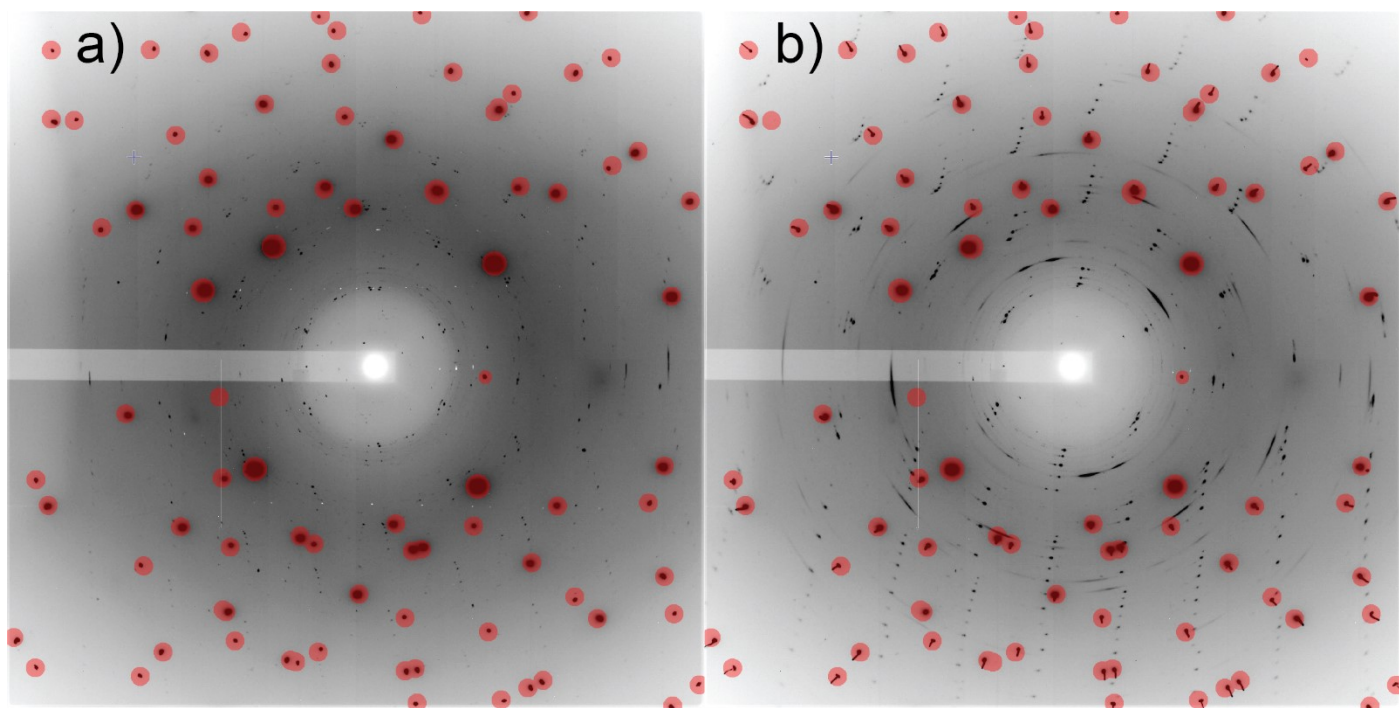

Figure S3. X-ray diffraction wide images of  $\text{WB}_4$  single crystal in a diamond anvil cell at 2.8(5) (a) and 53.2(5) GPa (b). The difference in the peaks intensity is attributed to a fact that at each pressure point the data collection was done at a slightly different spot on the crystal since the crystal's size ( $10 \times 10 \times 5 \mu\text{m}^3$ ) was larger than the X-ray beam (focal spot  $\sim 3 \mu\text{m}$ ). Large masked intense spots are diffraction peaks from diamond, elongated peaks belong to Ne pressure medium.

**Table S1. Experimental conditions in laser heating experiments in DAC and in multi-anvil apparatus.**

| <b>Initial phase composition</b>        | <b>Pressure, GPa</b>       | <b>Maximal temperature, K</b> | <b>Final phase composition</b>                                        |                                            |
|-----------------------------------------|----------------------------|-------------------------------|-----------------------------------------------------------------------|--------------------------------------------|
| <i>Laser-heating experiments in DAC</i> |                            |                               |                                                                       |                                            |
| Amorphous boron, W foil                 | 17.1(5)                    | 2850(200)                     | W <sub>2</sub> B, WB, W <sub>2</sub> B <sub>5</sub>                   |                                            |
| Amorphous boron, W foil                 | 30.3(5)                    | 2300(100)                     | W <sub>2</sub> B, WB, W <sub>2</sub> B <sub>5</sub> , WB <sub>4</sub> |                                            |
| <i>Multi-anvil experiments</i>          |                            |                               |                                                                       |                                            |
| <b>Initial phase composition</b>        | <b>Pressure range, GPa</b> | <b>Temperature, K</b>         | <b>Heating duration, hours</b>                                        | <b>Final phase composition</b>             |
| Amorphous boron + W foil                | 20                         | 2073                          | 2                                                                     | WB <sub>4</sub> , WB <sub>2</sub>          |
| Amorphous boron +<br>W powder           | 23                         | 2273                          | 3                                                                     | WB <sub>4</sub> polycrystal                |
| Amorphous boron + W                     | 20                         | 2073                          | 36                                                                    | WB <sub>2</sub> , WB <sub>4</sub> crystals |

**Table S2. Details of crystal structure refinements for WB<sub>4</sub> at high pressures (sp.gr. *P6<sub>3</sub>/mmc*; *Z* = 2; W1 2*d* (2/3, 1/3, 1/4), B1 4*f* (1/3, 2/3, *z*), B2 4*f* (1/3, 2/3, *z*))**

| Pressure, GPa                                                    | 0.0001     | 2.80(2)                                                                        | 5.9(5)     | 8.6(5)     | 12.0(5)    | 16.5(5)   | 21.4(5)   | 25.9(5)   | 31.2(5)    | 36.5(5)    | 42.2(5)    | 47.9(5)    | 53.2(5)    |
|------------------------------------------------------------------|------------|--------------------------------------------------------------------------------|------------|------------|------------|-----------|-----------|-----------|------------|------------|------------|------------|------------|
| <i>a</i> (Å)                                                     | 2.9578(6)  | 2.9349(4)                                                                      | 2.9240(3)  | 2.9185(6)  | 2.9014(3)  | 2.8905(3) | 2.8726(2) | 2.8625(3) | 2.8438(3)  | 2.8307(4)  | 2.8240(4)  | 2.8068(4)  | 2.7932(5)  |
| <i>c</i> (Å)                                                     | 10.996(3)  | 10.902(18)                                                                     | 10.861(4)  | 10.821(19) | 10.821(6)  | 10.793(4) | 10.730(3) | 10.713(5) | 10.664(6)  | 10.619(6)  | 10.589(10) | 10.567(5)  | 10.528(9)  |
| <i>V</i> (Å <sup>3</sup> )                                       | 83.31(4)   | 81.32(14)                                                                      | 80.42(3)   | 79.82(14)  | 78.89(5)   | 78.10(4)  | 76.68(2)  | 76.02(4)  | 74.69(5)   | 73.69(5)   | 73.13(7)   | 72.09(4)   | 71.14(7)   |
| $\rho_{\text{calc}}$ (g/cm <sup>3</sup> )                        | 9.053      | 9.274                                                                          | 9.379      | 9.448      | 9.56       | 9.657     | 9.835     | 9.921     | 10.097     | 10.235     | 10.313     | 10.461     | 10.602     |
| $\mu/\text{mm}^{-1}$                                             | 36.86      | 6.687                                                                          | 6.762      | 6.812      | 6.893      | 6.963     | 7.092     | 7.153     | 7.28       | 7.379      | 7.436      | 7.543      | 7.644      |
| 2 $\Theta_{\text{min}}$ for data collection (°)                  | 5.855      | 3.27                                                                           | 3.283      | 3.289      | 3.308      | 3.321     | 3.341     | 3.442     | 3.464      | 3.48       | 3.489      | 3.42       | 3.436      |
| 2 $\Theta_{\text{max}}$ for data collection (°)                  | 23.454     | 18.006                                                                         | 17.5       | 16.812     | 17.623     | 13.974    | 15.246    | 13.737    | 15.208     | 15.28      | 15.17      | 16.843     | 15.232     |
| Completeness to <i>d</i> = 0.8 Å                                 | 0.98       | 0.54                                                                           | 0.571      | 0.388      | 0.673      | 0.592     | 0.583     | 0.562     | 0.596      | 0.617      | 0.565      | 0.587      | 0.6        |
| Reflections collected                                            | 331        | 394                                                                            | 222        | 181        | 353        | 261       | 242       | 276       | 288        | 289        | 253        | 245        | 214        |
| Independent reflections                                          | 69         | 79                                                                             | 82         | 57         | 98         | 62        | 73        | 56        | 71         | 72         | 70         | 87         | 67         |
| Independent reflections<br>[ <i>I</i> > 2 $\sigma$ ( <i>I</i> )] | 66         | 69                                                                             | 73         | 50         | 87         | 56        | 67        | 51        | 66         | 67         | 64         | 79         | 62         |
| Refined parameters                                               | 7          | 7                                                                              | 7          | 7          | 7          | 7         | 7         | 7         | 7          | 7          | 7          | 7          | 7          |
| <i>R</i> <sub>int</sub> ( <i>F</i> <sup>2</sup> )                | 0.0322     | 0.044                                                                          | 0.0249     | 0.0451     | 0.0412     | 0.0455    | 0.0543    | 0.0619    | 0.0293     | 0.0282     | 0.0444     | 0.0192     | 0.0206     |
| <i>R</i> ( $\sigma$ )                                            | 0.019      | 0.0374                                                                         | 0.0309     | 0.0404     | 0.0315     | 0.0315    | 0.0326    | 0.045     | 0.0225     | 0.0207     | 0.0508     | 0.0171     | 0.0148     |
| <i>R</i> <sub>1</sub> [ <i>I</i> > 2 $\sigma$ ( <i>I</i> )]      | 0.0212     | 0.0243                                                                         | 0.0212     | 0.0368     | 0.0244     | 0.0251    | 0.0281    | 0.037     | 0.0233     | 0.0217     | 0.0216     | 0.0223     | 0.0217     |
| <i>wR</i> <sub>2</sub> [ <i>I</i> > 2 $\sigma$ ( <i>I</i> )]     | 0.0449     | 0.055                                                                          | 0.0493     | 0.0829     | 0.058      | 0.0599    | 0.067     | 0.0697    | 0.05       | 0.0504     | 0.0513     | 0.0512     | 0.0542     |
| <i>R</i> <sub>1</sub>                                            | 0.0264     | 0.0321                                                                         | 0.0226     | 0.0412     | 0.0271     | 0.0254    | 0.0309    | 0.0383    | 0.0243     | 0.023      | 0.0248     | 0.0234     | 0.0223     |
| <i>wR</i> <sub>2</sub>                                           | 0.0459     | 0.0572                                                                         | 0.0502     | 0.0849     | 0.0594     | 0.0601    | 0.0694    | 0.071     | 0.0506     | 0.0511     | 0.0522     | 0.0518     | 0.0545     |
| Goodness of fit on <i>F</i> <sup>2</sup>                         | 1.244      | 1.06                                                                           | 1.122      | 1.156      | 1.17       | 1.105     | 1.356     | 1.129     | 1.191      | 1.181      | 1.139      | 1.242      | 1.281      |
| $\Delta\rho_{\text{max}}$ ( <i>e</i> / Å <sup>3</sup> )          | 2.088      | 2.449                                                                          | 2.529      | 2.108      | 1.557      | 1.82      | 2.5       | 2.584     | 2.235      | 2.04       | 2.087      | 2.192      | 2.271      |
| $\Delta\rho_{\text{min}}$ ( <i>e</i> / Å <sup>3</sup> )          | -1.599     | -2.228                                                                         | -1.562     | -2.4       | -2.411     | -2.259    | -2.448    | -2.604    | -1.822     | -1.83      | -1.687     | -1.752     | -2.116     |
| <i>z</i> (B1)                                                    | 0.5466(13) | 0.546(3)                                                                       | 0.5422(16) | 0.541(7)   | 0.546(2)   | 0.547(3)  | 0.545(3)  | 0.550(4)  | 0.546(2)   | 0.5457(19) | 0.550(3)   | 0.5469(16) | 0.546(2)   |
| <i>z</i> (B2)                                                    | 0.1106(13) | 0.116(3)                                                                       | 0.1115(19) | 0.114(7)   | 0.112(2)   | 0.111(3)  | 0.115(3)  | 0.111(4)  | 0.113(2)   | 0.113(2)   | 0.112(3)   | 0.1114(18) | 0.113(2)   |
| <i>U</i> <sub>eq</sub> (Re1) (Å <sup>2</sup> )*                  | 0.0030(3)  | 0.0081(5)                                                                      | 0.0052(2)  | 0.0070(9)  | 0.0063(2)  | 0.0049(4) | 0.0038(3) | 0.0062(6) | 0.0061(3)  | 0.0059(3)  | 0.0070(3)  | 0.0055(2)  | 0.0064(3)  |
| <i>U</i> <sub>iso</sub> (B1) (Å <sup>2</sup> )                   | 0.002(2)   | 0.0064(18)                                                                     | 0.0023(15) | 0.008(4)   | 0.0079(18) | 0.005(3)  | 0.004(2)  | 0.008(4)  | 0.0054(18) | 0.0031(16) | 0.004(2)   | 0.0038(13) | 0.0052(18) |
| <i>U</i> <sub>iso</sub> (B2) (Å <sup>2</sup> )                   | 0.003(3)   | 0.0059(17)                                                                     | 0.0062(18) | 0.008(4)   | 0.0061(16) | 0.003(2)  | 0.006(2)  | 0.007(4)  | 0.0047(17) | 0.0059(18) | 0.006(2)   | 0.0056(14) | 0.0060(19) |
| <i>d</i> 1(W1...B2) (Å)                                          | 2.237(15)  | 2.24(2)                                                                        | 2.261(14)  | 2.24(5)    | 2.244(14)  | 2.244(19) | 2.20(2)   | 2.22(3)   | 2.195(15)  | 2.189(16)  | 2.19(2)    | 2.184(13)  | 2.163(16)  |
| <i>d</i> 2(W1...B1) (Å)                                          | 2.295(10)  | 2.22(3)                                                                        | 2.257(18)  | 2.26(7)    | 2.21(2)    | 2.19(3)   | 2.20(3)   | 2.15(5)   | 2.17(2)    | 2.17(2)    | 2.11(3)    | 2.146(17)  | 2.15(2)    |
| <i>d</i> 3(B1–B2) #1 (Å)                                         | 1.73(2)    | 1.77(5)                                                                        | 1.67(3)    | 1.68(11)   | 1.71(3)    | 1.71(4)   | 1.71(4)   | 1.73(7)   | 1.70(3)    | 1.68(3)    | 1.72(4)    | 1.67(3)    | 1.67(3)    |
| <i>d</i> 4(B1–B2) #2 (Å)                                         | 1.847(7)   | 1.854(18)                                                                      | 1.848(11)  | 1.86(4)    | 1.822(13)  | 1.805(17) | 1.822(18) | 1.78(2)   | 1.792(13)  | 1.784(12)  | 1.758(15)  | 1.758(10)  | 1.762(13)  |
| <i>d</i> 5(B1–B1) (Å)                                            | 1.991(15)  | 1.97(3)                                                                        | 1.921(17)  | 1.91(7)    | 1.95(2)    | 1.96(3)   | 1.92(3)   | 1.97(5)   | 1.91(2)    | 1.90(2)    | 1.95(3)    | 1.900(18)  | 1.88(2)    |
| Data collection                                                  | In house   | DESY, Extreme Conditions Beamline, Perkin Elmer detector, $\lambda = 0.2900$ Å |            |            |            |           |           |           |            |            |            |            |            |
| CSD number                                                       | 2158536    | 2158520                                                                        | 2158521    | 2158522    | 2158523    | 2158524   | 2158525   | 2158526   | 2158527    | 2158528    | 2158529    | 2158530    | 2158531    |

\**U*<sub>eq</sub> is defined as one third of the trace of the orthogonalized *U*<sup>ij</sup> tensor.
